# Supplementary material for: Cisplatin radiosensitizes radioresistant human mesenchymal stem cells
Source: PubMed Central journal article supplement (PMC5675674; doi:10.18632/oncotarget.21214), 2017-09-23
Supplement: oncotarget-08-87809-s001.pdf [file oncotarget-08-87809-s001.pdf]

# Cisplatin radiosensitizes radioresistant human mesenchymal stem cells

## SUPPLEMENTARY MATERIALS

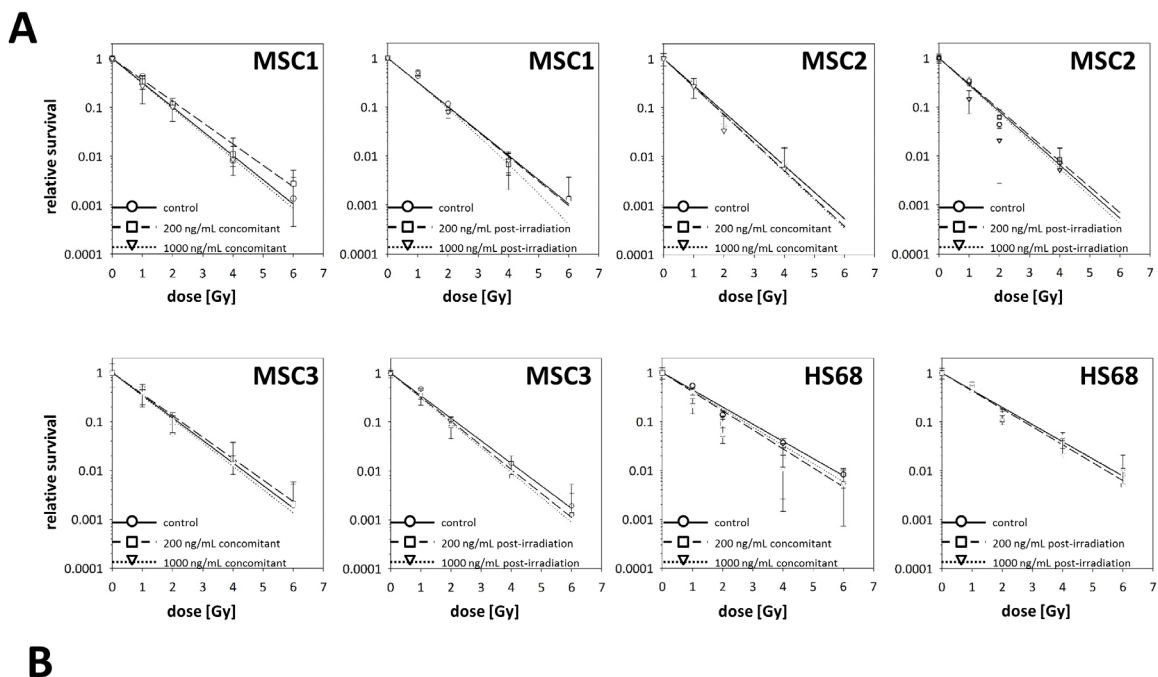

**Supplementary Figure 1: Post-irradiation or concomitant cisplatin treatment does not lead to radiosensitization. (A)** Clonogenic survival assays of MSCs and HS68 fibroblasts after concomitant cisplatin and radiation treatment (“concomitant”) or treatment with cisplatin 24 hours after irradiation (“post-irradiation”). **(B)** SER values for each cell line and treatment scheduling.

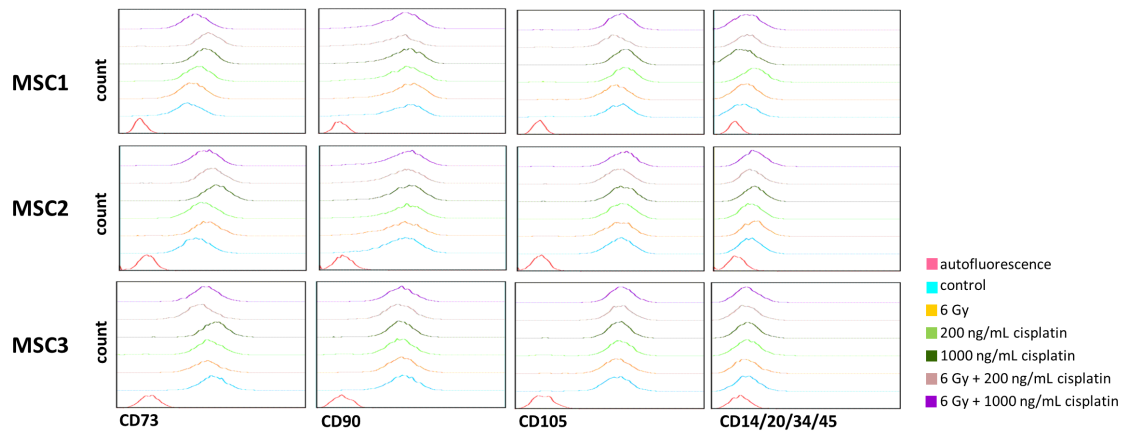

**Supplementary Figure 2: MSC surface marker expression is unaffected by cisplatin-based chemo-radiation.** Flow cytometry analyses of positive and negative MSC surface markers at 24 hours after cisplatin-based chemo-radiation.

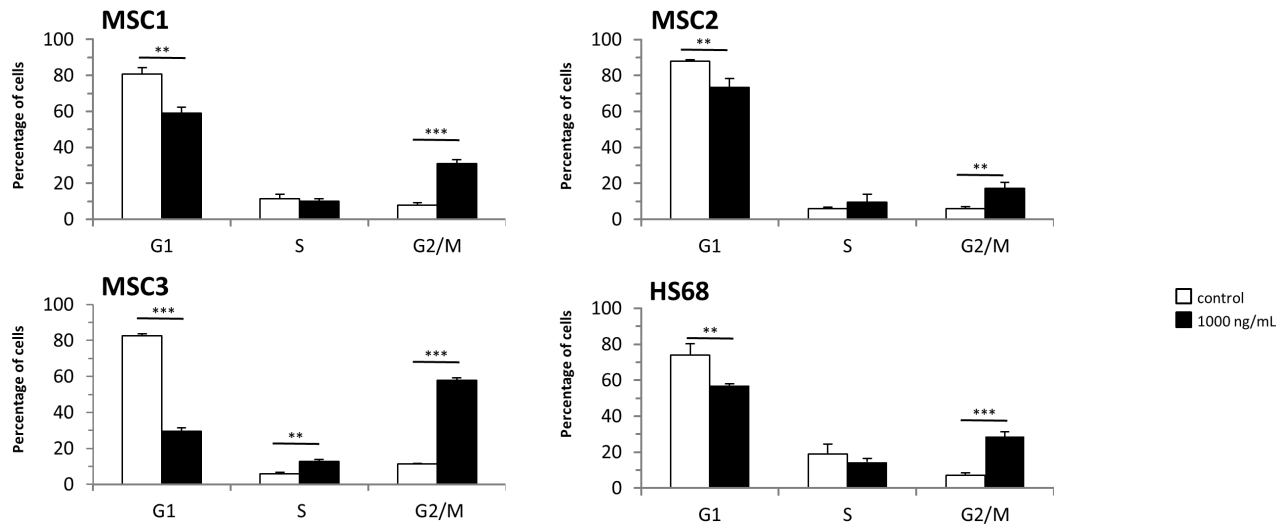

**Supplementary Figure 3: Cisplatin pre-treatment results in a G2 phase accumulation.** Cell cycle distribution of MSCs and HS68 fibroblasts at 48 hours after exposure to 1000ng/mL cisplatin. \*\* $P < 0.01$ , \*\*\* $P < 0.001$ .

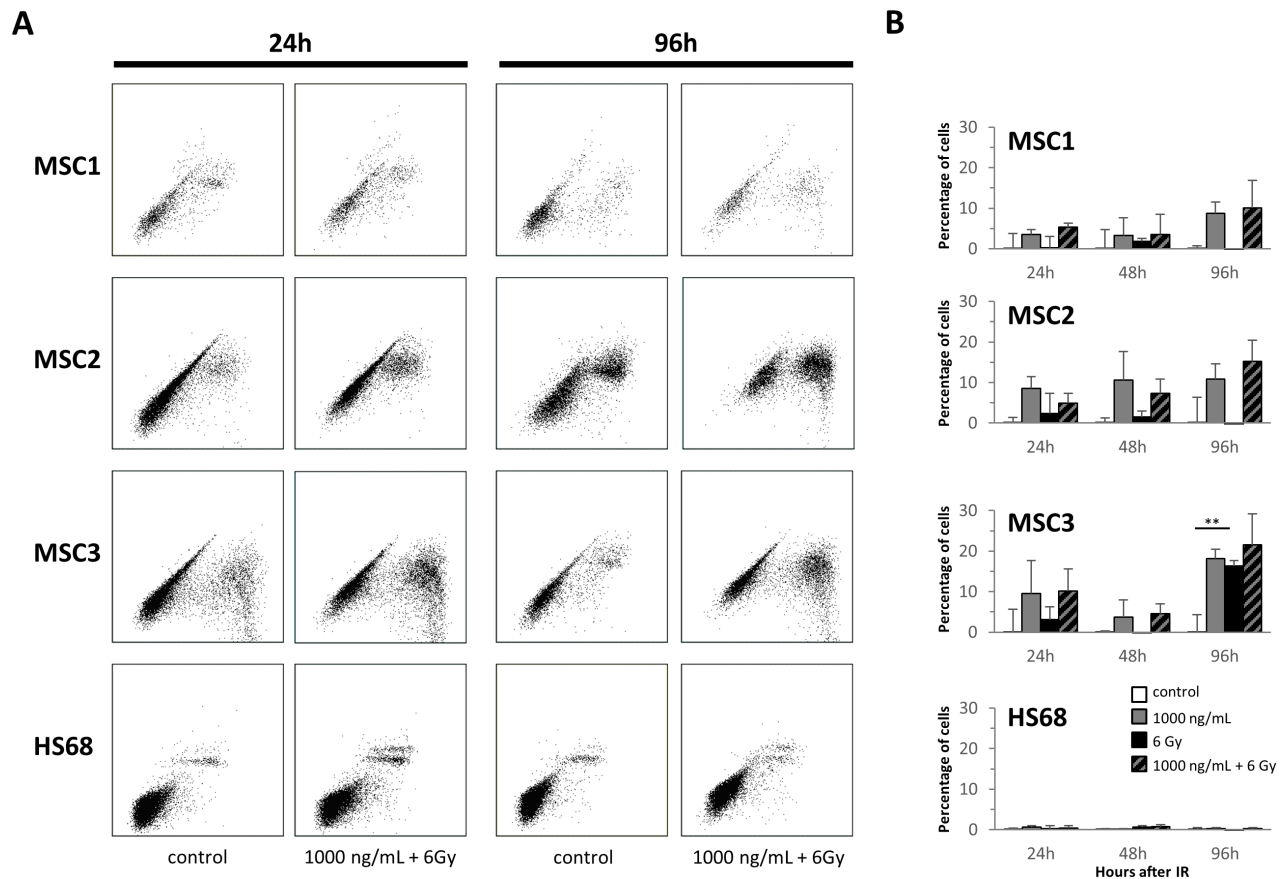

**Supplementary Figure 4: Cisplatin-based chemo-radiation increases early apoptosis in MSCs. (A)** Dot plots of simultaneous annexin-V and 7-AAD staining at 24 and 96 hours after cisplatin-based chemo-radiation. **(B)** Early apoptosis levels of MSCs and HS68 fibroblasts at various time points after cisplatin-based chemo-radiation. **\*\* $P < 0.01$** .
